# Supplementary material for: E3 Ubiquitin Ligase APC/CCdh1 Regulation of Phenylalanine Hydroxylase Stability and Function
Source: PubMed Central journal article supplement (PMC7729981; doi:10.3390/ijms21239076), 2020-11-28

## Supplementary Figures

### **E3 ubiquitin ligase APC/C<sup>Cdh1</sup> regulation of phenylalanine hydroxylase stability and function**

Apoorvi Tyagi<sup>1†</sup>, Neha Sarodaya<sup>1†</sup>, Kamini Kaushal<sup>1</sup>, Arun Pandian Chandrasekaran<sup>1</sup>, Ainsley Mike Antao<sup>1</sup>, Bharathi Suresh<sup>1</sup>, Byung-Ho Rhie<sup>1</sup>, Kye-Seong Kim<sup>1,2\*</sup> and Suresh Ramakrishna<sup>1,2\*</sup>

<sup>1</sup>Graduate School of Biomedical Science and Engineering, Hanyang University, Seoul, South Korea

<sup>2</sup>College of Medicine, Hanyang University, Seoul, South Korea

† These authors have contributed equally: Apoorvi Tyagi and Neha Sarodaya

#### **\*Corresponding authors**

SR (E-mail: suri28@hanyang.ac.kr, suresh.ramakris@gmail.com);

KS (E-mail: ks66kim@hanyang.ac.kr)

## **Table of Contents**

**Figure S1:** A. Comparison of PAH expression in different tissue types obtained from The Human Protein Atlas. B. Representative immunohistochemical staining of endogenous PAH and Cdh1 in human liver (Tumor) and non-neoplastic tissue (Normal).

**Table S1:** Oligonucleotides used for sgRNA plasmid construction.

**Table S2:** Oligonucleotide sequences used to get PCR amplicon for T7E1 assay.

**Table S3:** PCR amplicon and cleavage sizes after T7E1 assay.

**Figure S2.** The original uncropped images for immunoblots in the main figures.

**Figure S1**

**A.**

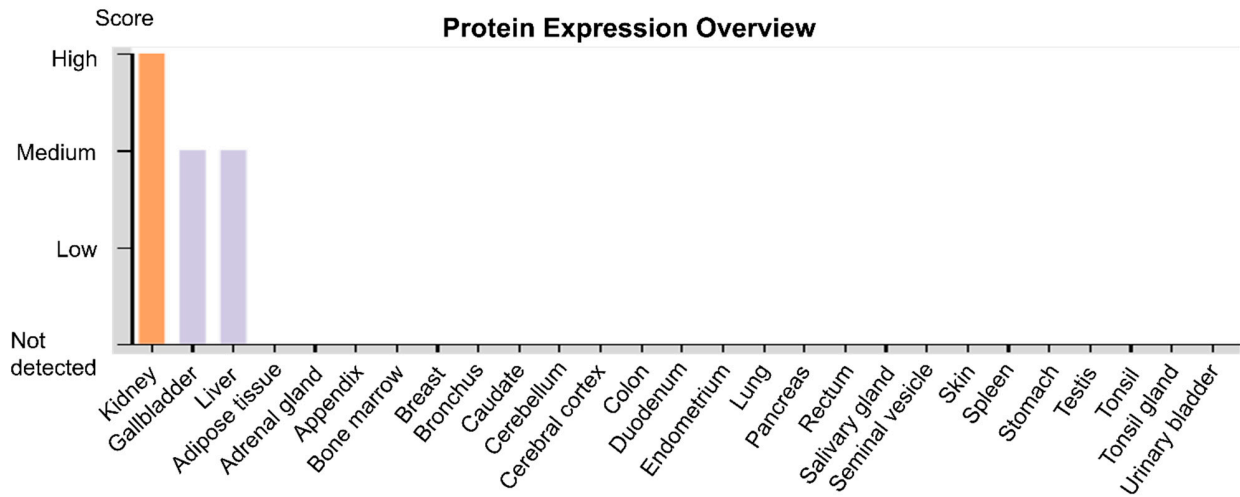

**B.**

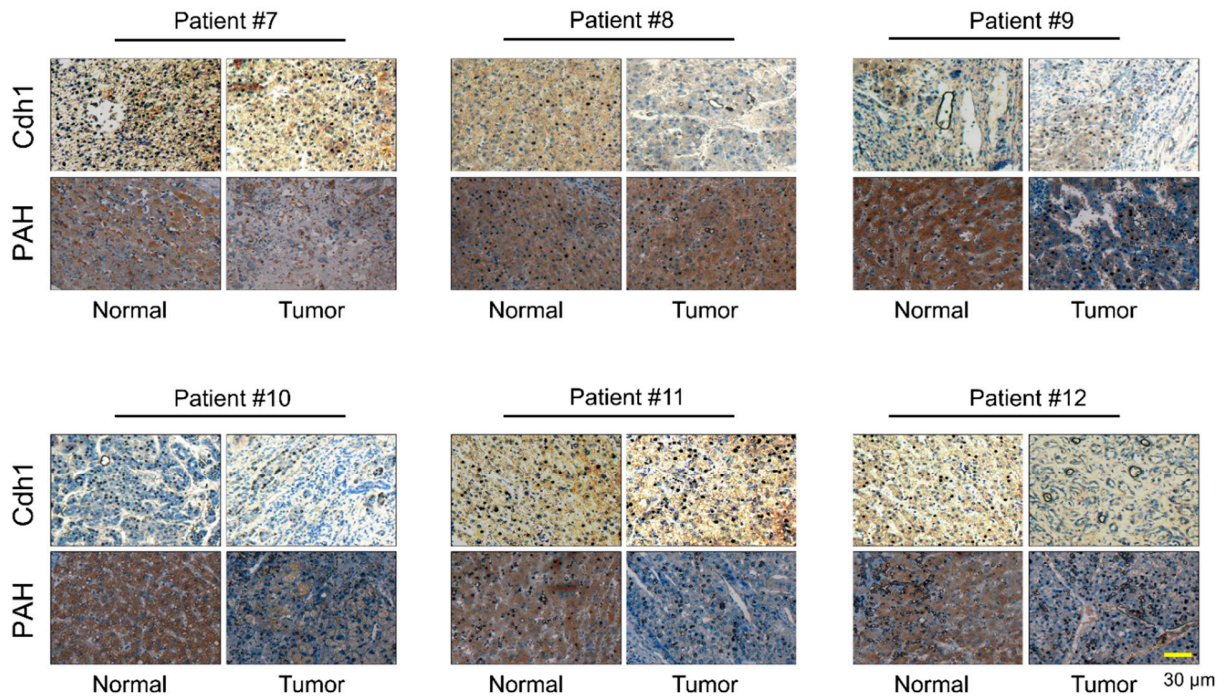

**Figure S1:** A. Comparison of PAH expression in different tissue types obtained from The Human Protein Atlas. Moderate to strong PAH protein expression was observed in Kidney, Liver and Gallbladder tissues. B. Representative immunohistochemical staining of endogenous PAH and Cdh1 in human liver (Tumor) and non-neoplastic tissue (Normal). Scale bar = 30  $\mu$ m

**Table S1:** Oligonucleotides used for sgRNA plasmid construction.

| Gene        | sgRNA  | Direction | Sequence (5' to 3')  |
|-------------|--------|-----------|----------------------|
| <i>Cdh1</i> | sgRNA1 | FP        | GCAGTACACGGAGCACCTGG |
|             |        | RP        | CCAGGTGCTCCGTGTACTGC |
|             | sgRNA2 | FP        | CGCTTCTGGAACACGCTGAC |
|             |        | RP        | GTCAGCGTGTTCCAGAAGCG |

**Table S2:** Oligonucleotide sequences used to get PCR amplicon for T7E1 assay.

| Gene        | sgRNA                   | Direction | Sequence (5' to 3')  |
|-------------|-------------------------|-----------|----------------------|
| <i>Cdh1</i> | sgRNA1<br>and<br>sgRNA2 | FP        | AACGACAACAAGGTACCCCC |
|             |                         | FP1       | GCTGCTGGTCTGGAATCACT |
|             |                         | RP        | CTATGCCTGCTGCCTCACAT |
|             |                         | RP1       | CCATCTCCCTTCAGAGCGAC |

**Table S3:** PCR amplicon and cleavage sizes after T7E1 assay.

| Gene        | sgRNA  | PCR size | Cleavage size | Orientation |
|-------------|--------|----------|---------------|-------------|
| <i>Cdh1</i> | sgRNA1 | 355      | 299+56        | Sense       |
|             | sgRNA2 | 355      | 151+196       | Sense       |

**Figure S2.** The original uncropped images for immunoblots in the main figures.

**Figure 1A**

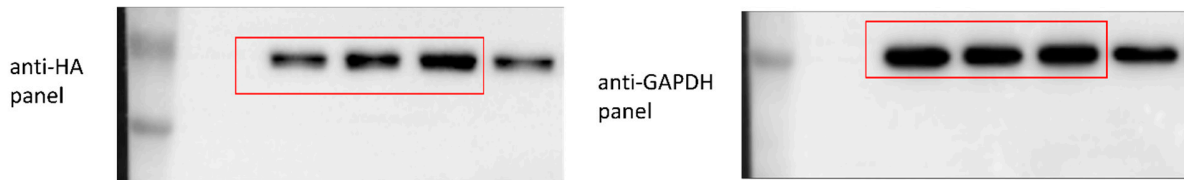

**Figure 1B**

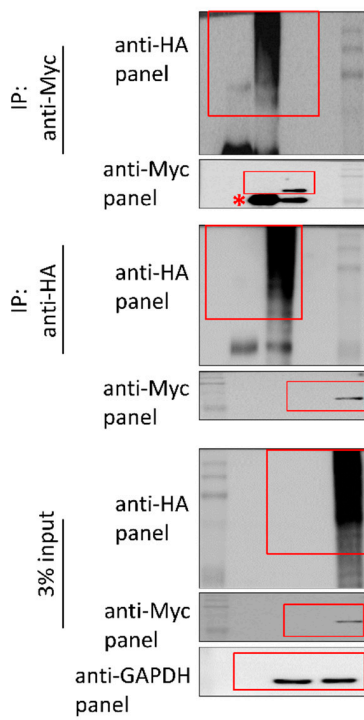

**Figure 1C**

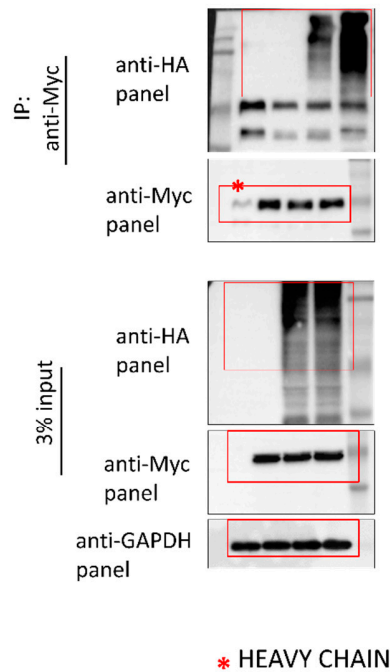

**Figure 1D**

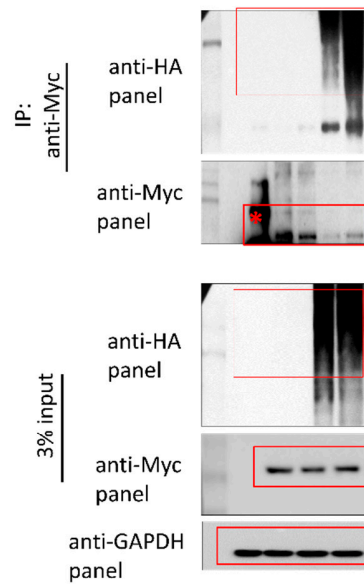

**Figure 2A**

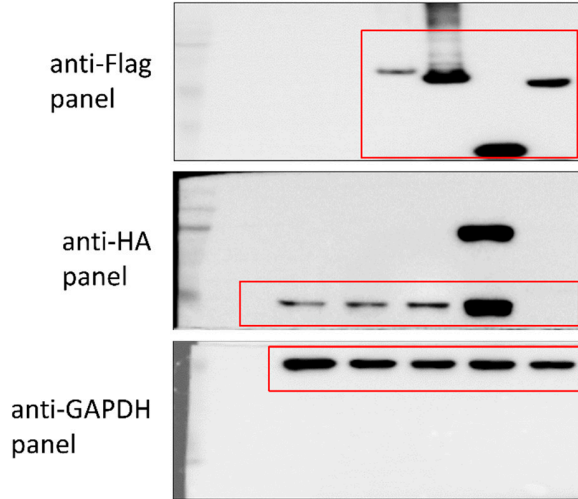

**Figure 2B**

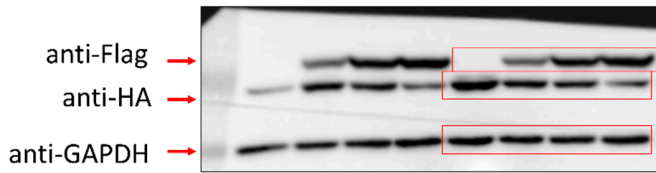

**Figure 2C**

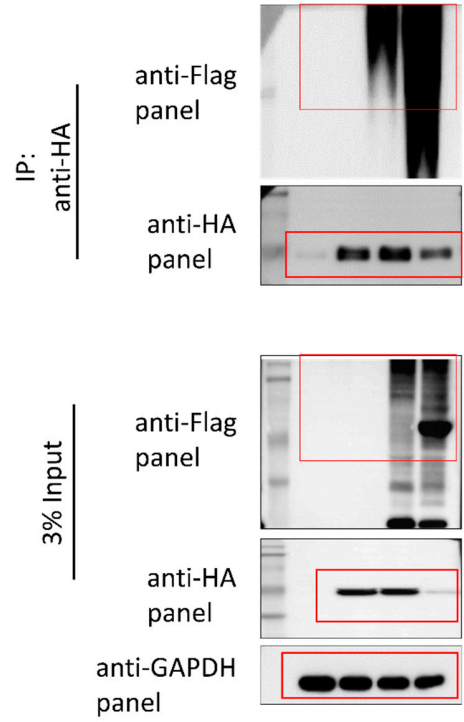

**Figure 3C**

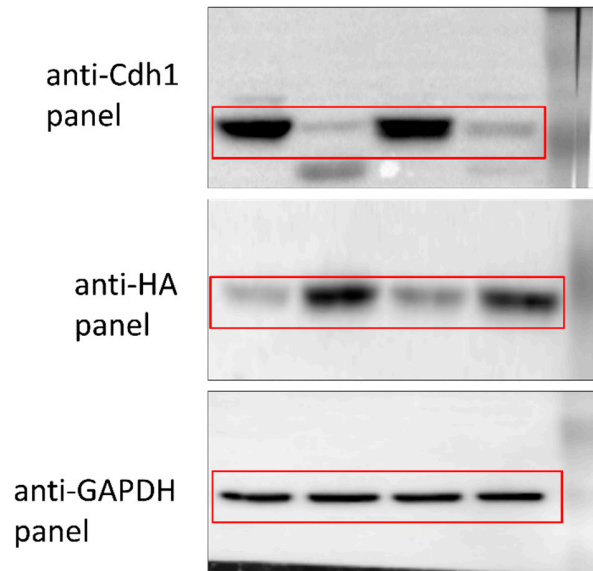



Figure 4A

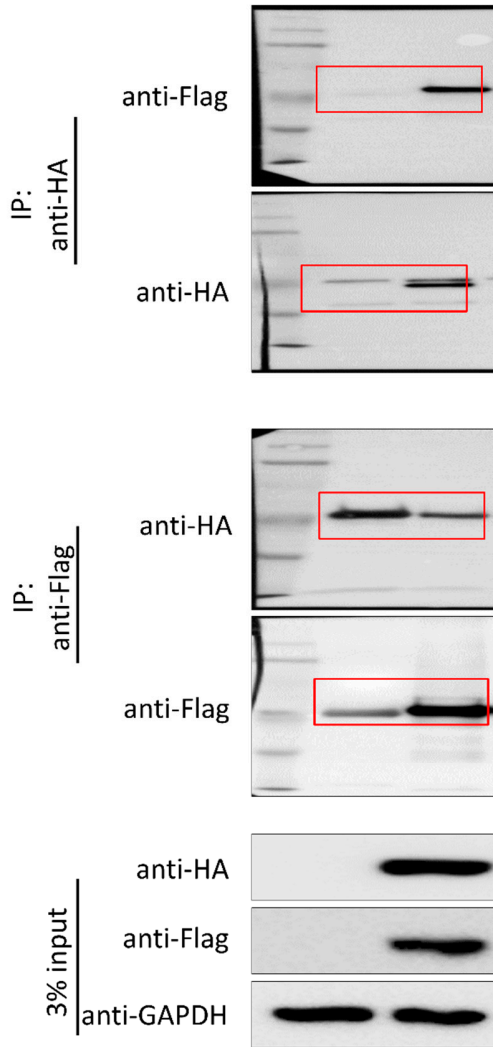

Figure 4B

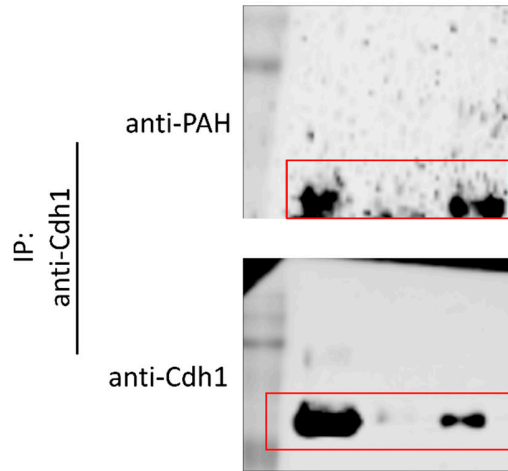

**Figure 5A**

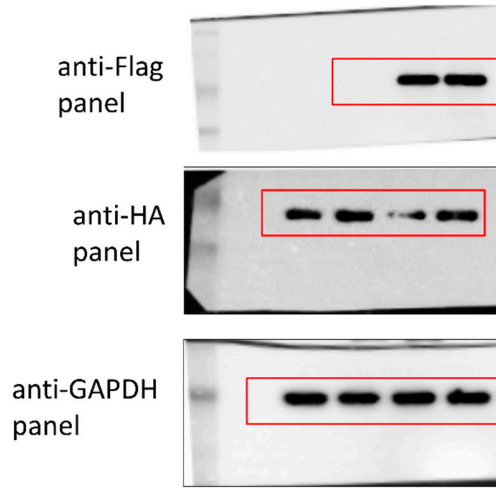

**Figure 5B**

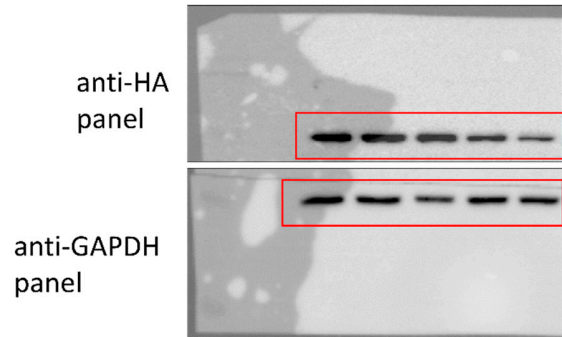

**Figure 5C**

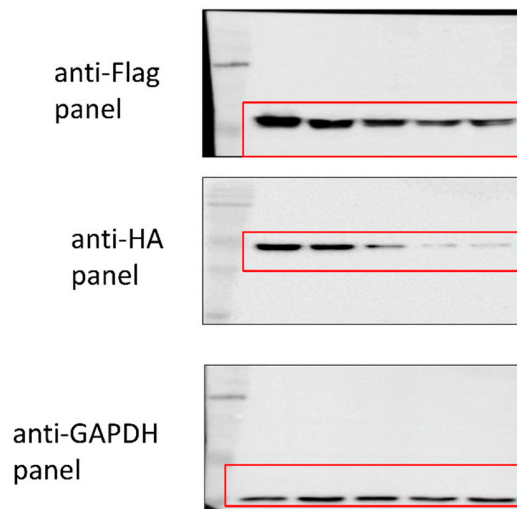

Figure 6A

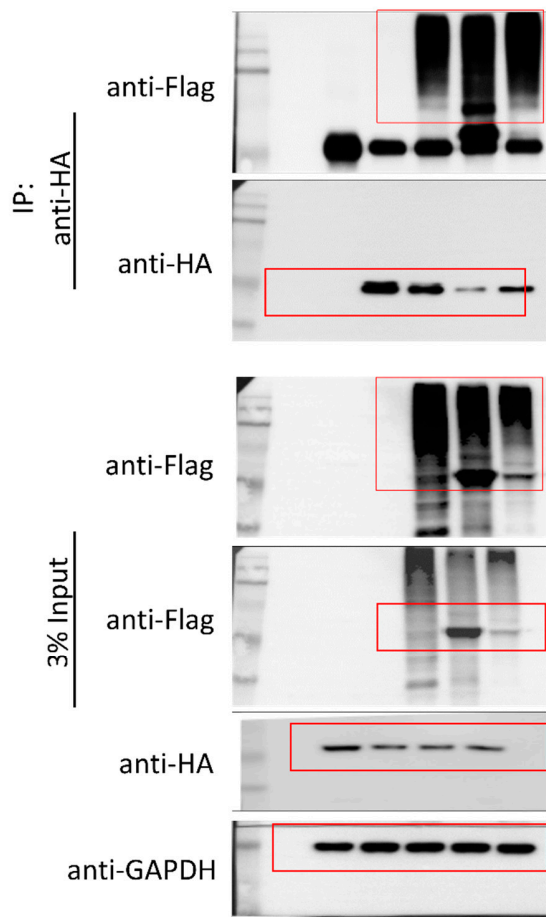

Figure 6B

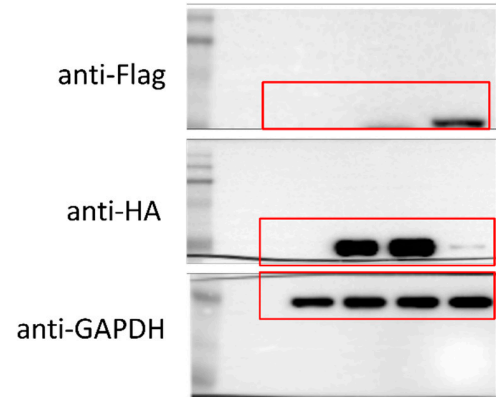

Supplement: ijms-21-09076-s001.pdf [file ijms-21-09076-s001.pdf]
